# Supplementary material
Source: publisher figshare collection journal article supplement (https://acs.figshare.com/ndownloader/files/3791461)

## **Photoregulating RNA digestion using azobenzene linked dumbbell antisense oligodeoxynucleotides**

Li Wu<sup>†,‡</sup>, Yujian He<sup>\*†,‡</sup> and Xinjing Tang<sup>\*‡</sup>

<sup>†</sup>School of Chemistry and Chemical Engineering, University of Chinese Academy of Sciences, Beijing 100049, China

<sup>‡</sup>State Key Laboratory of Natural and Biomimetic Drugs, School of Pharmaceutical Sciences, Peking University, Beijing 100191, China

### **Contents**

|                                                                                                                                            |     |
|--------------------------------------------------------------------------------------------------------------------------------------------|-----|
| 1. Synthetic procedure of 2-cyanoethyl-4-O- {[4-(4,4'-dimethoxytrityl)-O-methyl-diazenyl]benzyl}-N,N'-diisopropylaminophosphoramidite..... | S2  |
| 2. Structural characteristics of all azobenzene linked dumbbell asODNs before and after UV irradiation.....                                | S4  |
| 3. Typical melting curves of all azobenzene linked dumbbell asODNs before and after UV irradiation.....                                    | S8  |
| 4. Photoregulation of target RNA binding with azobenzene linked dumbbell asODNs .....                                                      | S11 |
| 5. Photoregulation of RNA digestion with azobenzene linked dumbbell asODNs .....                                                           | S15 |
| 6. Characterization of all azobenzene derivatives .....                                                                                    | S20 |
| 7. Characterization of all azobenzene linked dumbbell asODNs .....                                                                         | S23 |

# 1. Synthetic procedure of 2-cyanoethyl-4-O-{[4-(4,4'-dimethoxytrityl)-O-methyl-diazenyl]benzyl}-N,N'-diisopropylaminophosphoramidite

**Figure S1.** Synthetic procedure of azobenzene phosphoramidite.

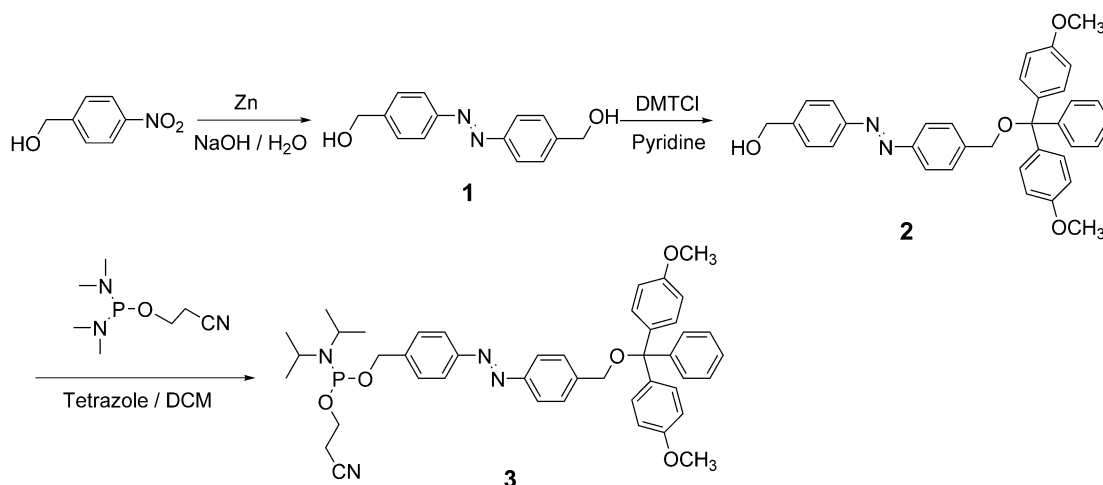

**Compound 1. 4,4'-bis(hydroxyethyl)-azobenzene:** 6.0 g (26 mmol)

4-nitrobenzyl alcohol was added to 70 mL NaOH (5.7 M) aqueous solution, and 7.0 g (100 mmol) Zn power was added slowly. After addition of the materials, the solution was refluxed with stirring vigorously. After 24 h, the reaction mixture was filtered, and the filtered solid was suspended in hot methanol until the azo components were dissolved completely. Air was bubbled to the azobenzene methanol solution and refluxed for 10 h. Upon concentration on vacuum evaporator, the resulting methanol solution was slowly cooled to give orange solid 3.2 g, with yield 50 %. <sup>1</sup>H NMR (DMSO, 400 M): δ 7.87 (d, 4H), 7.54 (d, 4H), 5.39 (t, 2H), 4.61 (d, 4H). <sup>13</sup>C NMR (DMSO, 101 M): δ 105.84, 146.24, 127.09, 122.34, 62.43.

**Compound 2. 4-hydroxymethyl-4'-O-(4,4'-dimethoxytrityl)-azobenzene:** 1.5 g (6.5 mmol) of 4,4'-bis(hydroxyethyl)-azobenzene was dissolved in 30 mL dry

pyridine. Part of pyridine was distilled to remove water residue in the solution. After cooling the solution, 2.1 g (6.5 mmol) 4,4'-dimethoxytrityl chloride was added while stirring vigorously. The reaction was monitored by TLC. The reaction mixture was concentrated and the residue was purified by silica gel chromatography with CH<sub>2</sub>Cl<sub>2</sub>/MeOH (volume ratio: 100/2) to give orange solids (2.0 g), yield 34%. <sup>1</sup>H NMR (CDCl<sub>3</sub>, 400 M): δ 7.90 (m, 4H), 7.52 (m, 6H), 7.42 (m, 4H), 7.24 (m, 3H), 6.85 (m, 4H), 4.73 (s, 2H), 4.26 (s, 2H) 3.78 (s, 6H). <sup>13</sup>C NMR (CDCl<sub>3</sub>, 101 M): δ 158.56, 152.05, 151.84, 144.99, 144.44, 142.58, 136.19, 130.1, 128.2, 127.93, 127.46, 127.34, 126.87, 122.98, 122.82, 113.22, 86.63, 65.31, 64.40, 55.24.

**Compound 3. 2-Cyanoethyl-4-O-[[4-(4,4'-dimethoxytrityl)-O-methyl-diazenyl]]**

**benzyl}-N,N'-diisopropylaminophosphoramidite:** To the solution of 4-hydroxymethyl-4'-O-(4,4'-dimethoxytrityl)-azobenzene (0.160 g, 0.29 mmol) dissolved in 2 mL dry acetonitrile, 0.120 g 2-cyanoethyl-N,N,N',N'-tetraisopropylphosphora-diamidite and 21 mg (0.30 mmol) 1H-tetrazole were added. The mixture was stirred under N<sub>2</sub> and the reaction was monitored by TLC (yield was estimated above 90%). After an hour, the solution was filtered using hydrophobic membrane filter and moved to a vial for application to DNA synthesis without purification, and completion of the reaction was identified by <sup>31</sup>PNMR. <sup>31</sup>PNMR (CDCl<sub>3</sub>, 162 M): δ 148.92, 148.77.

## 2. Structural characteristics of all azobenzene linked dumbbell asODNs before and after UV irradiation.

**Figure S2.** UV-Vis spectral changes of 4,4'-bis(hydroxyethyl)-azobenzene and **Az18-4** through illumination with UV or visible light. Photoirradiation experiments of 4,4'-bis(hydroxyethyl)-azobenzene were performed in 3:7 MeOH/H<sub>2</sub>O at room temperature with UV irradiation (365 nm, 7 mW/cm<sup>2</sup>, *trans*-to-*cis*) and visible irradiation (>400 nm, 11 W, *cis*-to-*trans*), and **Az18-4** was dissolved in 1×PBS and irradiated. Inset: plots of absorbance at maximum absorption of azobenzene as a function of UV irradiation time and visible irradiation time.

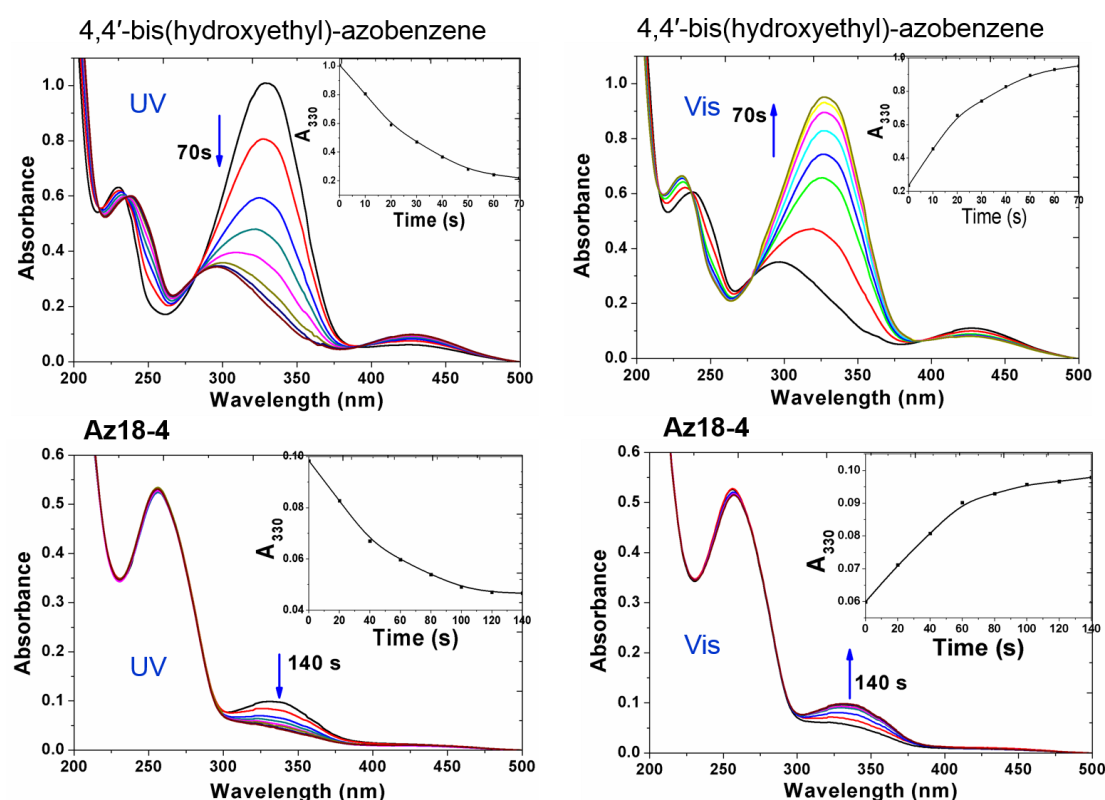

**Figure S3.** UV/vis absorbance spectra of the respective isomeric forms of all azobenzene linked dumbbell ODNs before and after light illumination. The samples (2  $\mu\text{M}$ ) were irradiated with UV (365 nm,  $7\text{mW}/\text{cm}^2$ , *trans*-to-*cis*) in 1 $\times$ PBS until absorbance changes were no longer observable.

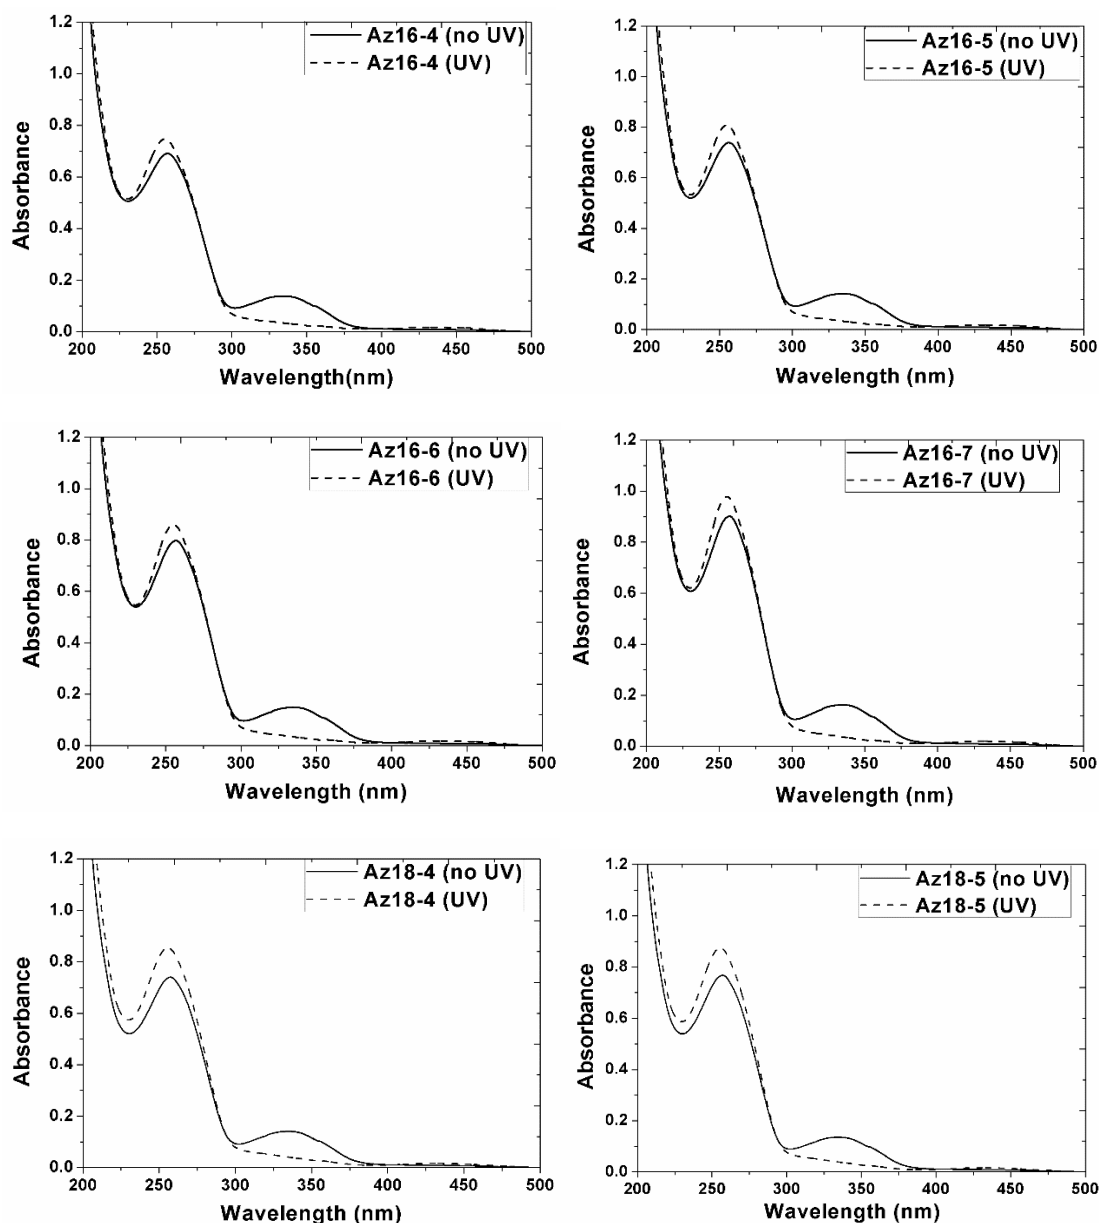

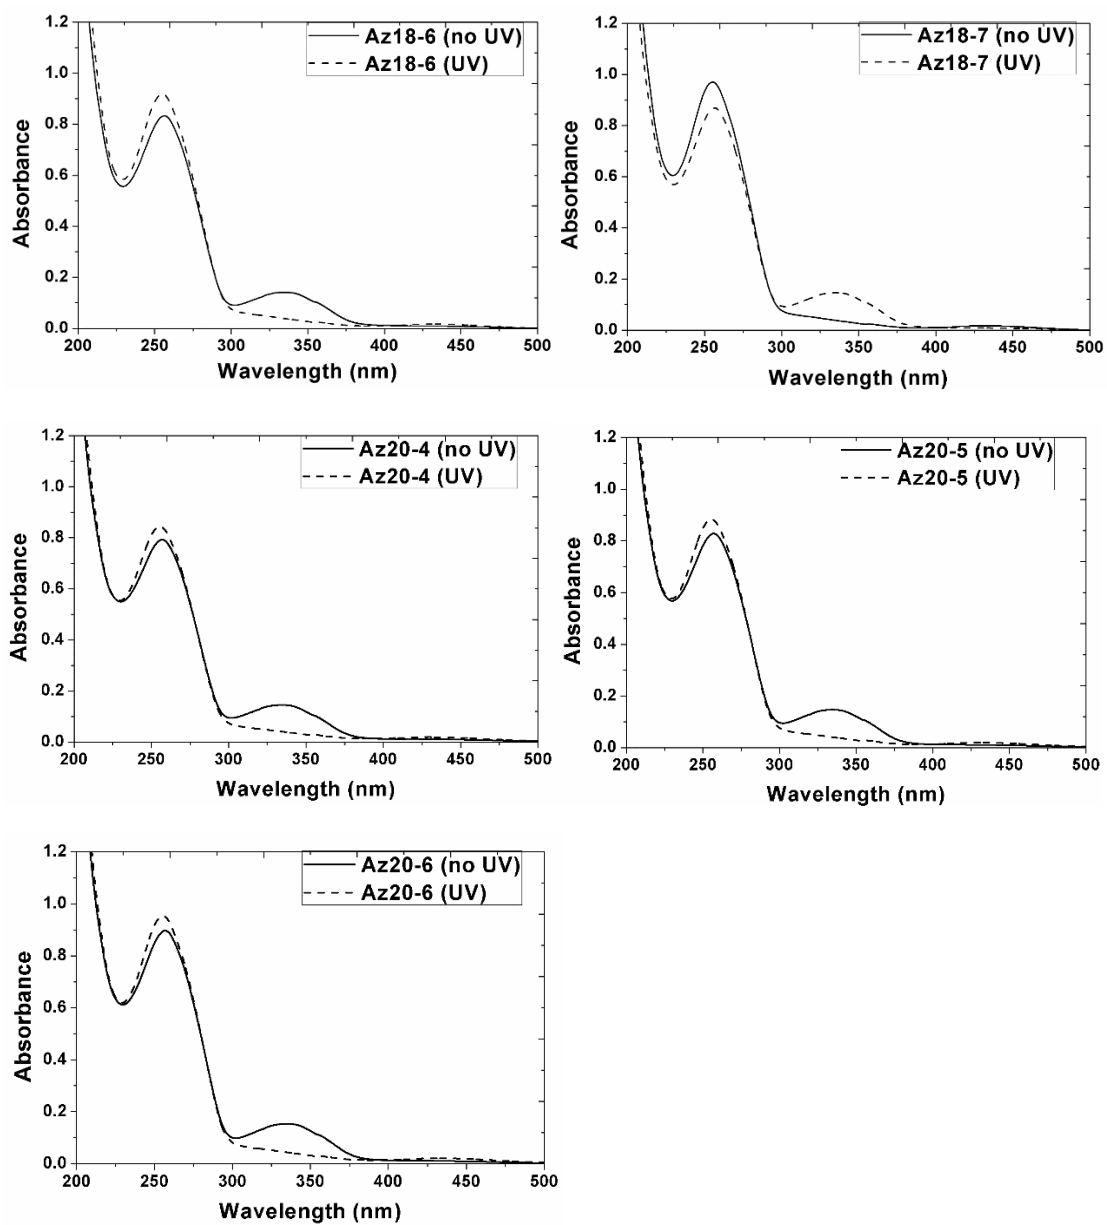

**Figure S4.** Native polyacrylamide gel electrophoresis of all azobenzene linked dumbbell asODNs before and after light illumination (365 nm, 7 mW/cm<sup>2</sup>). The samples from left to right were corresponding to *trans*-Az18-4, *cis*-Az18-4, *trans*-Az18-5, *cis*-Az18-5, *trans*-Az18-6, *cis*-Az18-6, *trans*-Az18-7, *cis*-Az18-7.

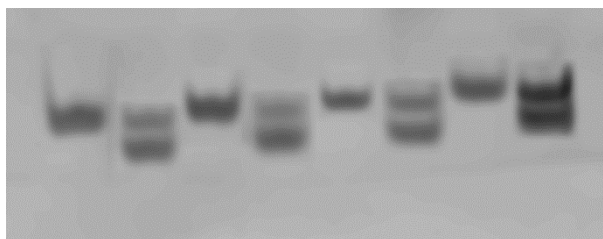

**Figure S5.** A) Plots of absorbance at maximum absorption of azobenzene for *cis*-Az18-4, *cis*-Az18-5, *cis*-Az18-6 and *cis*-Az18-7 in 1×PBS as a function of temperature; B) Plots of absorbance at maximum absorption of azobenzene for *cis*-Az18-4 with increasing time at 20°C or 37°C.

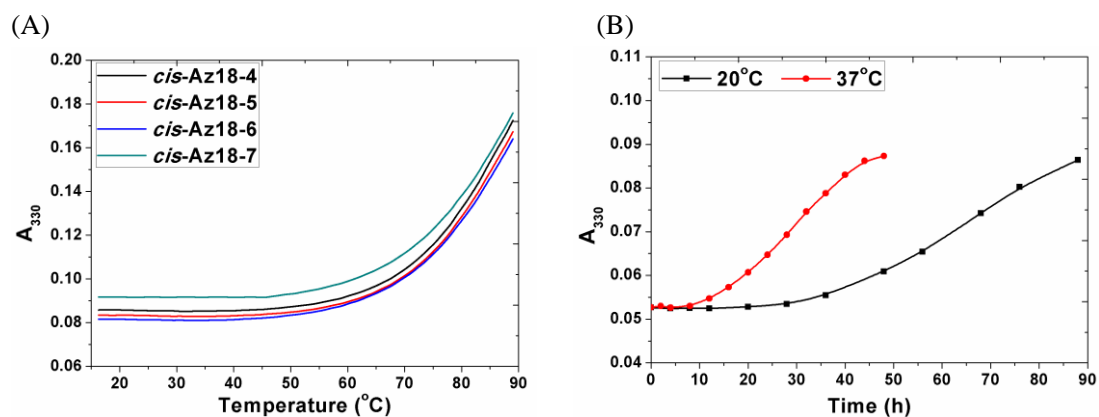

### 3. Typical melting curves of all azobenzene linked dumbbell asODNs before and after UV irradiation

**Figure S6.** A) Typical melting curves of all azobenzene linked dumbbell asODNs themselves. The black and dashed lines present the melting curves before and after irradiation with UV light (365 nm, 7 mW/cm<sup>2</sup>), respectively. UV melting experiments were performed in 1×PBS and ODN concentrations were adjusted to 2 μM. B) Typical  $T_m$  derivative (dA/dT) plot of UV melting curve for Az18-4.

A)

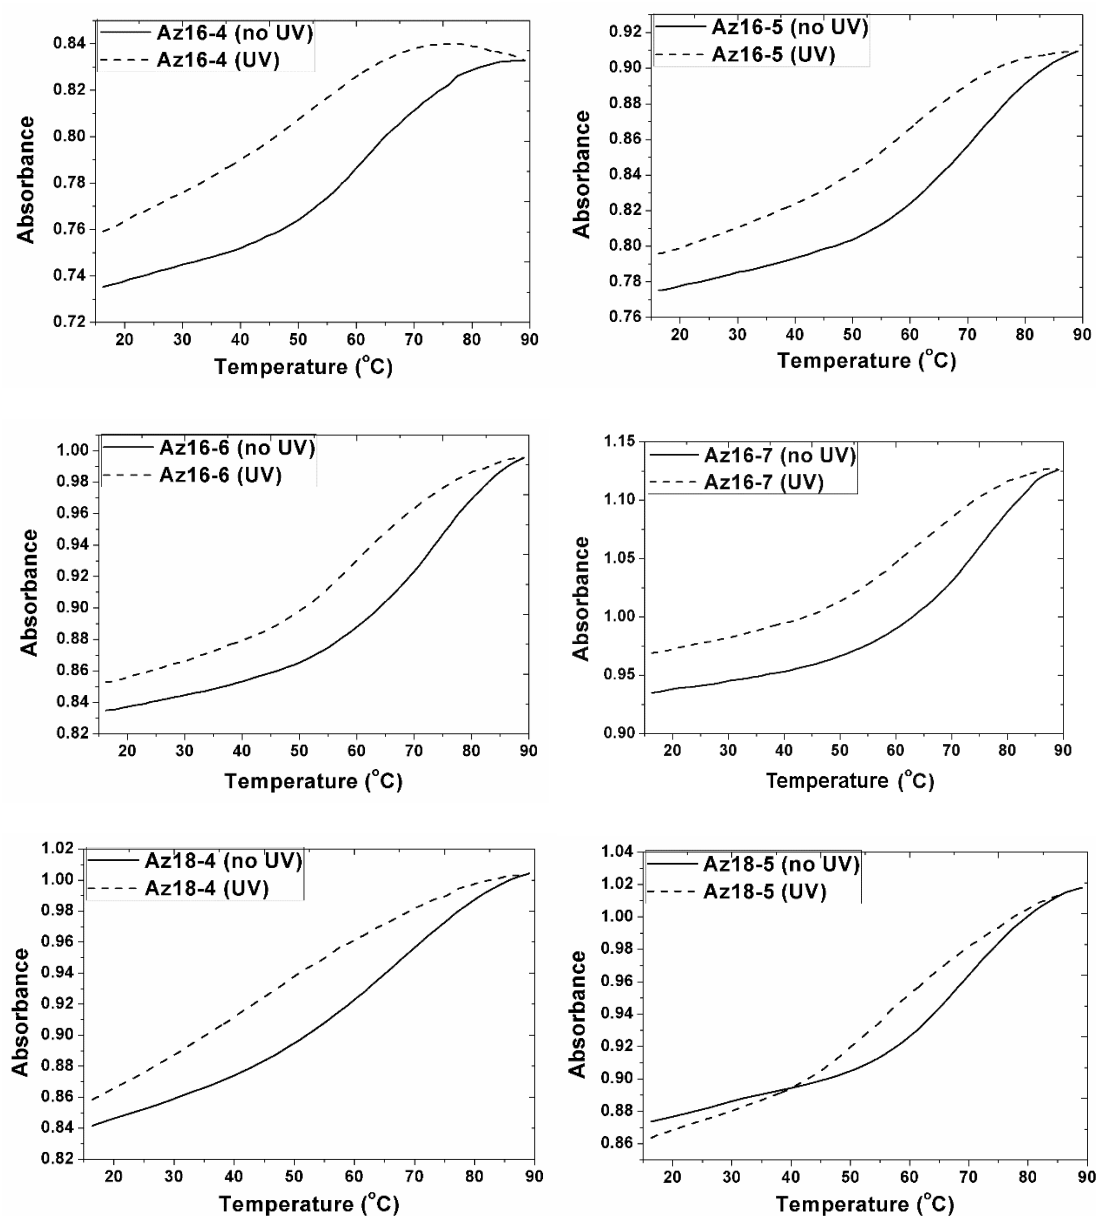



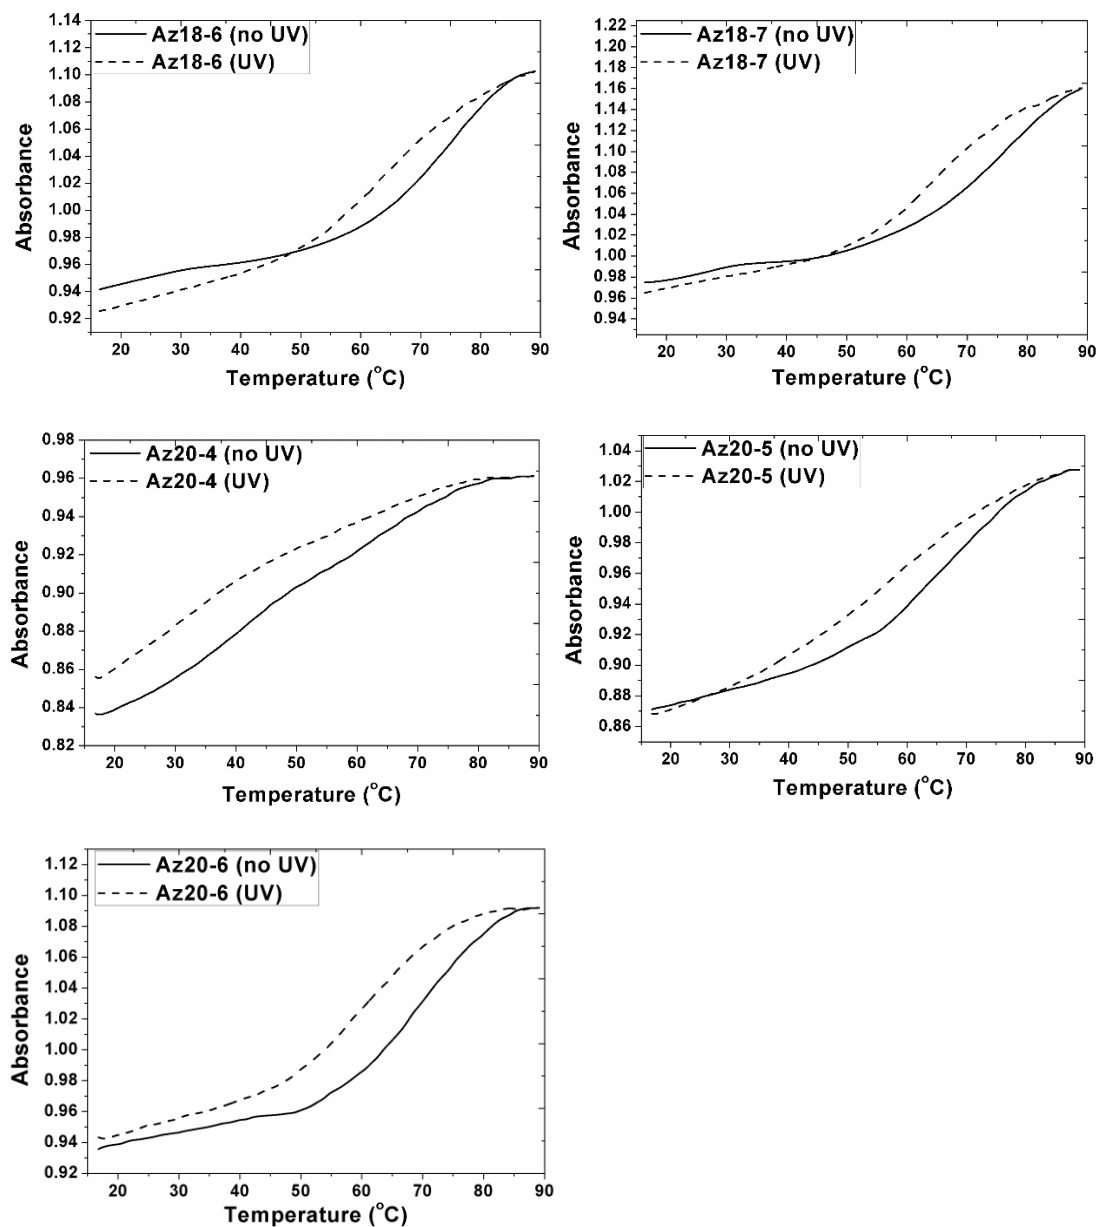

B)

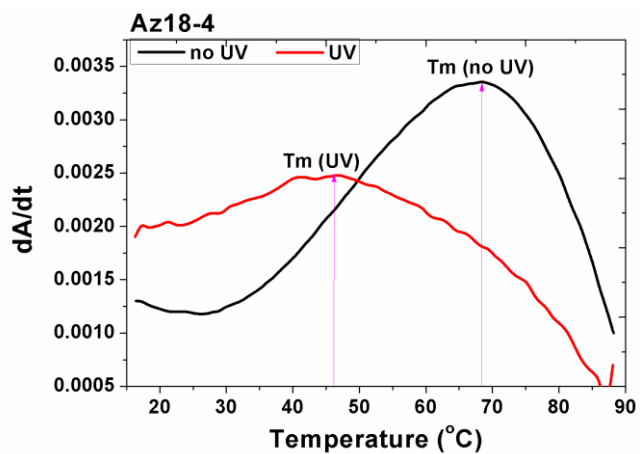

**Figure S7.**  $T_m$  comparison of azobenzene linked dumbbell asODNs before and after UV irradiation. Red column represents  $T_m$ s of *cis*-azobenzene linked ODNs, and black column represents  $T_m$ s of *trans*-azobenzene linked ODNs.

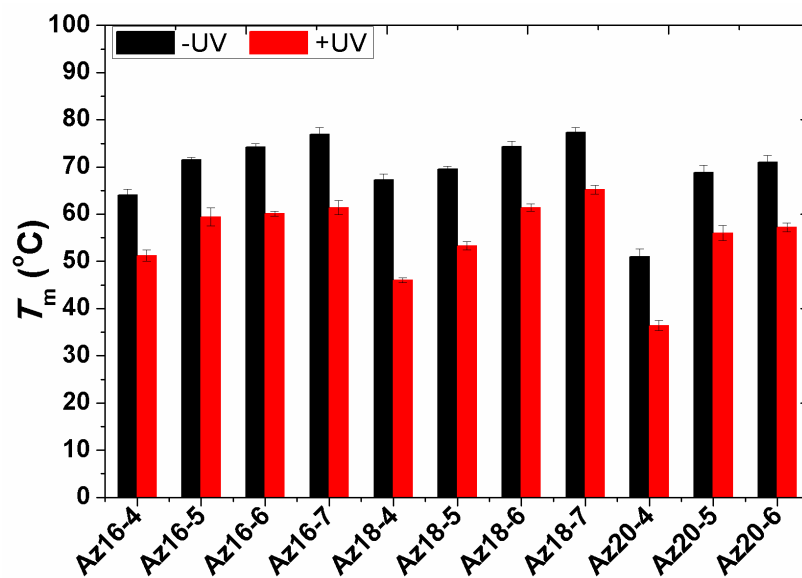

#### 4. Photoregulation of binding target RNA with azobenzene linked dumbbell asODNs

**Table S1.** The ratios of the binding of azobenzene linked dumbbell asODNs (2  $\mu$ M, 10  $\mu$ M and 20  $\mu$ M) with the complementary FAM-labeled RNA (1  $\mu$ M) in 5  $\mu$ L 1 $\times$ PBS buffer after 30 min incubation at 37°C. UV irradiation was performed for the mixture of dumbbell asODNs and FAM-RNA within 2 min.

|               |           |           |            |            |           |            |            |
|---------------|-----------|-----------|------------|------------|-----------|------------|------------|
| <b>Az16-4</b> | Lane1     | Lane2     | Lane3      | Lane4      | Lane5     | Lane6      | Lane7      |
|               | 0 $\mu$ M | 2 $\mu$ M | 10 $\mu$ M | 20 $\mu$ M | 2 $\mu$ M | 10 $\mu$ M | 20 $\mu$ M |
| UV            | –         | –         | –          | –          | +         | +          | +          |
| ODN/RNA(%)    | 0         | 4.8       | 8.1        | 8.3        | 53.6      | 53.7       | 57.0       |
|               |           | 4.9       | 4.3        | 8.1        | 14.1      | 18.5       | 18.6       |
| RNA (%)       | 100       | 90.3      | 87.6       | 83.6       | 32.3      | 27.8       | 24.4       |
| <b>Az16-5</b> | Lane1     | Lane2     | Lane3      | Lane4      | Lane5     | Lane6      | Lane7      |
|               | 0 $\mu$ M | 2 $\mu$ M | 10 $\mu$ M | 20 $\mu$ M | 2 $\mu$ M | 10 $\mu$ M | 20 $\mu$ M |
| UV            | –         | –         | –          | –          | +         | +          | +          |
| ODN/RNA(%)    | 0         |           |            |            | 17.5      | 8.3        | 11.3       |
|               |           | 3.6       | 7.2        | 17.7       |           | 18.1       | 21.6       |
| RNA (%)       | 100       | 96.4      | 92.8       | 82.3       | 82.5      | 73.6       | 67.1       |
| <b>Az16-6</b> | Lane1     | Lane2     | Lane3      | Lane4      | Lane5     | Lane6      | Lane7      |
|               | 0 $\mu$ M | 2 $\mu$ M | 10 $\mu$ M | 20 $\mu$ M | 2 $\mu$ M | 10 $\mu$ M | 20 $\mu$ M |
| UV            | –         | –         | –          | –          | +         | +          | +          |
| ODN/RNA(%)    | 0         | 0         | 2.6        | 3.3        | 0         | 3.3        | 4.4        |
| RNA (%)       | 100       | 100       | 97.4       | 96.7       | 100       | 96.7       | 95.6       |
| <b>Az16-7</b> | Lane1     | Lane2     | Lane3      | Lane4      | Lane5     | Lane6      | Lane7      |
|               | 0 $\mu$ M | 2 $\mu$ M | 10 $\mu$ M | 20 $\mu$ M | 2 $\mu$ M | 10 $\mu$ M | 20 $\mu$ M |
| UV            | –         | –         | –          | –          | +         | +          | +          |
| ODN/RNA(%)    | 0         | 0         | 1.3        | 2.3        | 0         | 2.3        | 2.2        |
| RNA (%)       | 100       | 100       | 98.7       | 97.7       | 100       | 97.7       | 97.8       |

|               |           |           |            |            |           |            |            |
|---------------|-----------|-----------|------------|------------|-----------|------------|------------|
| <b>Az18-4</b> | Lane1     | Lane2     | Lane3      | Lane4      | Lane5     | Lane6      | Lane7      |
|               | 0 $\mu$ M | 2 $\mu$ M | 10 $\mu$ M | 20 $\mu$ M | 2 $\mu$ M | 10 $\mu$ M | 20 $\mu$ M |
| UV            | –         | –         | –          | –          | +         | +          | +          |
| ODN/RNA(%)    | 0         | 4.6       | 4.9        | 4.8        | 48.4      | 47.5       | 50.5       |
|               |           | 3.2       | 3.2        | 8.3        | 10.0      | 8.8        | 20.8       |
|               |           | 2.6       | 3.8        | 7.4        | 13.6      | 19.1       | 18.4       |
| RNA (%)       | 100       | 89.6      | 87.9       | 79.6       | 27.7      | 24.6       | 20.3       |
| <b>Az18-5</b> | Lane1     | Lane2     | Lane3      | Lane4      | Lane5     | Lane6      | Lane7      |
|               | 0 $\mu$ M | 2 $\mu$ M | 10 $\mu$ M | 20 $\mu$ M | 2 $\mu$ M | 10 $\mu$ M | 20 $\mu$ M |
| UV            | –         | –         | –          | –          | +         | +          | +          |
| ODN/RNA(%)    | 0         |           |            |            | 15.5      | 14.6       | 14.9       |
|               |           | 2.6       | 3.3        | 2.0        | 12.5      | 16.2       | 21.2       |
|               |           | 3.3       | 4.3        | 7.1        | 5.1       | 7.5        | 11.0       |
| RNA (%)       | 100       | 94.1      | 92.4       | 90.9       | 66.9      | 61.7       | 52.9       |
| <b>Az18-6</b> | Lane1     | Lane2     | Lane3      | Lane4      | Lane5     | Lane6      | Lane7      |
|               | 0 $\mu$ M | 2 $\mu$ M | 10 $\mu$ M | 20 $\mu$ M | 2 $\mu$ M | 10 $\mu$ M | 20 $\mu$ M |
| UV            | –         | –         | –          | –          | +         | +          | +          |
| ODN/RNA(%)    | 0         |           |            |            |           | 4.0        | 5.9        |
|               |           | 0         | 4.2        | 7.8        | 0         | 2.1        | 5.0        |
| RNA (%)       | 100       | 100       | 95.8       | 92.8       | 100       | 93.9       | 89.1       |
| <b>Az18-7</b> | Lane1     | Lane2     | Lane3      | Lane4      | Lane5     | Lane6      | Lane7      |
|               | 0 $\mu$ M | 2 $\mu$ M | 10 $\mu$ M | 20 $\mu$ M | 2 $\mu$ M | 10 $\mu$ M | 20 $\mu$ M |
| UV            | –         | –         | –          | –          | +         | +          | +          |
| ODN/RNA(%)    | 0         |           |            |            |           | 3.2        | 3.2        |
|               |           | 0         | 2.6        | 4.3        | 0         | 5.1        | 4.2        |
| RNA (%)       | 100       | 100       | 97.4       | 95.7       | 100       | 91.7       | 92.6       |
| <b>Az20-4</b> | Lane1     | Lane2     | Lane3      | Lane4      | Lane5     | Lane6      | Lane7      |
|               | 0 $\mu$ M | 2 $\mu$ M | 10 $\mu$ M | 20 $\mu$ M | 2 $\mu$ M | 10 $\mu$ M | 20 $\mu$ M |
| UV            | –         | –         | –          | –          | +         | +          | +          |
| ODN/RNA(%)    | 0         | 50.0      | 51.4       | 50.8       | 65.9      | 69.8       | 67.3       |

|               |           |           |            |            |           |            |            |
|---------------|-----------|-----------|------------|------------|-----------|------------|------------|
|               |           | 27.5      | 28.2       | 30.3       | 23.5      | 21.9       | 25.1       |
| RNA (%)       | 100       | 22.5      | 20.4       | 18.9       | 10.6      | 8.3        | 7.6        |
| <b>Az20-5</b> | Lane1     | Lane2     | Lane3      | Lane4      | Lane5     | Lane6      | Lane7      |
|               | 0 $\mu$ M | 2 $\mu$ M | 10 $\mu$ M | 20 $\mu$ M | 2 $\mu$ M | 10 $\mu$ M | 20 $\mu$ M |
| UV            | –         | –         | –          | –          | +         | +          | +          |
| ODN/RNA(%)    | 0         | 21.8      | 17.0       | 21.1       | 48.8      | 45.9       | 46.6       |
|               |           | 34.4      | 44.1       | 42.7       | 26.8      | 31.3       | 34.1       |
| RNA (%)       | 100       | 43.8      | 38.9       | 36.2       | 24.4      | 22.8       | 19.3       |
| <b>Az20-6</b> | Lane1     | Lane2     | Lane3      | Lane4      | Lane5     | Lane6      | Lane7      |
|               | 0 $\mu$ M | 2 $\mu$ M | 10 $\mu$ M | 20 $\mu$ M | 2 $\mu$ M | 10 $\mu$ M | 20 $\mu$ M |
| UV            | –         | –         | –          | –          | +         | +          | +          |
| ODN/RNA(%)    | 0         | 18.1      | 20.4       | 25.2       | 38.6      | 30.4       | 34.7       |
|               |           | 11.6      | 14.1       | 21.5       | 18.3      | 30.7       | 34.2       |
| RNA (%)       | 100       | 70.3      | 65.5       | 53.3       | 43.1      | 38.9       | 31.1       |

**Figure S8.** Native PAGE gels (20%) of the binding of azobenzene linked dumbbell asODNs (10  $\mu$ M) with the complementary FAM-labeled RNA (1  $\mu$ M) in 5  $\mu$ L 1 $\times$ PBS buffer after 30 min incubation at 37°C. 2 min UV irradiation and 2 min Vis irradiation after 2 min UV irradiation were performed for the mixture of dumbbell asODNs and FAM-RNA.

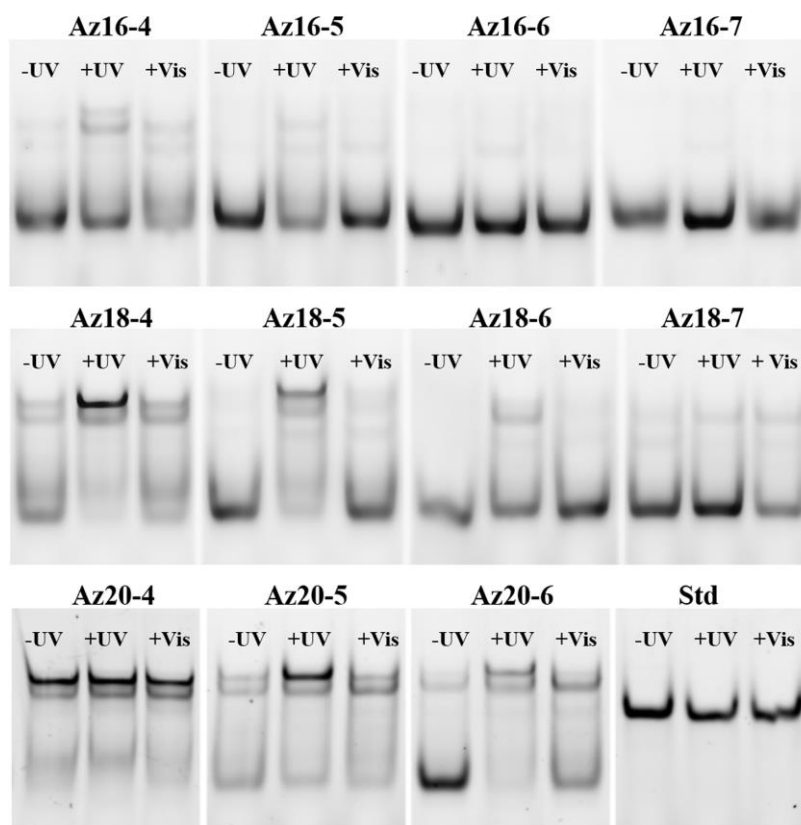

## 5. Photoregulation of RNA digestion with azobenzene linked dumbbell asODNs

**Table S2.** The fractions of RNA degradation at 37 °C for all azobenzene linked dumbbell asODNs before and after 2 min UV irradiation with 70 min incubation.

| ODNs          | Cleaved RNA (%) |          |         |
|---------------|-----------------|----------|---------|
|               | -UV             | +UV      | +UV/-UV |
| <b>Az16-4</b> | 12.1±1.5        | 39.3±3.4 | 3.2     |
| <b>Az16-5</b> | 5.2±0.9         | 19.3±2.1 | 3.7     |
| <b>Az16-6</b> | 1.8±1.2         | 10.9±2.3 | 6.1     |
| <b>Az16-7</b> | 0±0             | 0±0      | --      |
| <b>Az18-4</b> | 19.9±1.9        | 83.5±3.7 | 4.2     |
| <b>Az18-5</b> | 4.9±1.4         | 36.7±2.6 | 7.5     |
| <b>Az18-6</b> | 1.6±1.0         | 11.2±2.2 | 7.0     |
| <b>Az18-7</b> | 1.4±0.8         | 1.9±0.7  | 1.4     |
| <b>Az20-4</b> | 54.8±2.6        | 87.2±4.1 | 1.6     |
| <b>Az20-5</b> | 41.2±4.9        | 61.5±4.1 | 1.5     |
| <b>Az20-6</b> | 16.3±1.4        | 38.4±3.1 | 2.4     |
| <b>Std</b>    | 100             | 100      | 1       |

**Figure S9.** Denaturing PAGE (20%) of photomodulation of the RNA digestion by RNase H in presence of 1  $\mu$ M FAM-labeled RNA, 0.05  $\mu$ M azobenzene linked asODNs (**Az16-4**, **Az16-5**, **Az16-6**, **Az16-7**, **Az18-6**, **Az18-7**, **Az20-4**, **Az20-5**, **Az20-6** and **Std**) and 0.25 U RNase H in 25  $\mu$ L RNase H buffer without or with UV irradiation (365 nm, 7 mW/cm<sup>2</sup>) at 37  $^{\circ}$ C with increasing incubation time. Aliquots of each incubated sample were removed at 0 min, 10 min, 25 min, 45 min and 70 min.

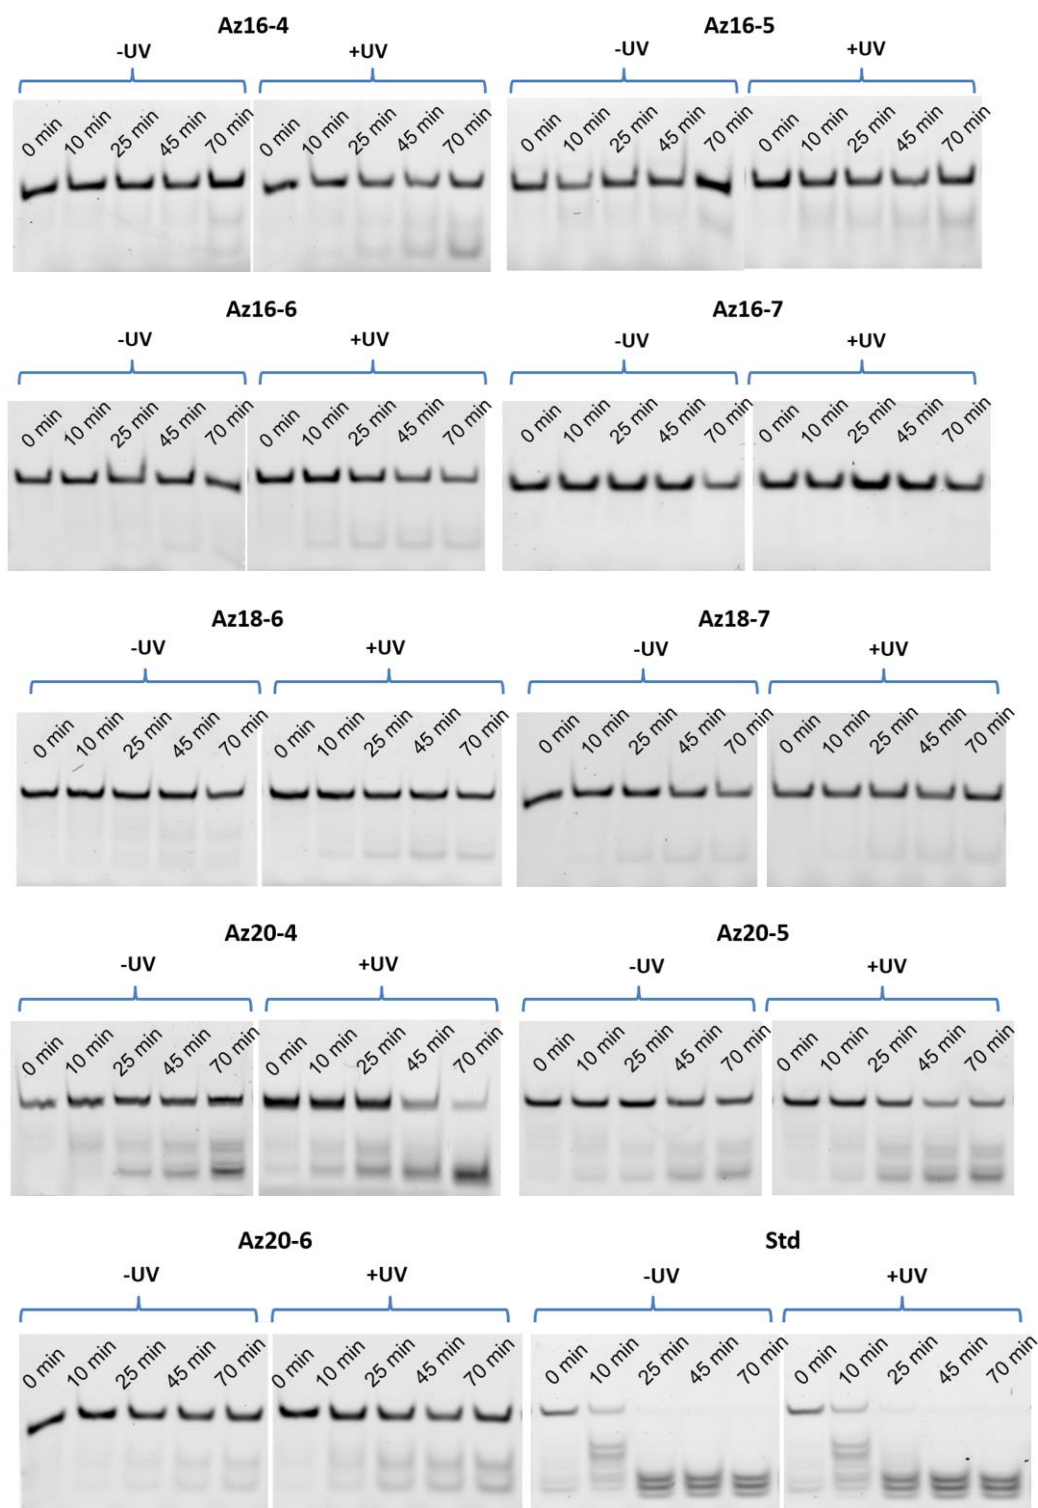



**Table S3.** The fractions of RNA degradation at 37 °C for all azobenzene linked dumbbell asODNs before and after 2 min UV irradiation. Quantitative analysis of RNA digestion was performed with each incubated sample at 0 min, 10 min, 25 min, 45 min and 70 min.

|                      |       |       |       |       |       |       |       |       |       |        |
|----------------------|-------|-------|-------|-------|-------|-------|-------|-------|-------|--------|
| <b>Az16-4</b>        | Lane1 | Lane2 | Lane3 | Lane4 | Lane5 | Lane6 | Lane7 | Lane8 | Lane9 | Lane10 |
| UV                   | –     | –     | –     | –     | –     | +     | +     | +     | +     | +      |
| Uncleaved<br>RNA (%) | 100   | 99.2  | 98.8  | 97.3  | 86.2  | 100   | 89.2  | 84.6  | 84.6  | 62.3   |
| Cleaved<br>RNA (%)   | 0     | 0.8   | 1.2   | 0.9   | 5.1   | 0     | 1.1   | 1.1   | 1.4   | 9.4    |
|                      |       |       |       | 1.8   | 8.7   |       | 9.7   | 14.3  | 14.0  | 28.3   |
| <b>Az16-5</b>        | Lane1 | Lane2 | Lane3 | Lane4 | Lane5 | Lane6 | Lane7 | Lane8 | Lane9 | Lane10 |
| UV                   | –     | –     | –     | –     | –     | +     | +     | +     | +     | +      |
| Uncleaved<br>RNA (%) | 100   | 97.8  | 99.0  | 98.8  | 95.2  | 100   | 86.5  | 87.6  | 81.4  | 78.6   |
| Cleaved<br>RNA (%)   | 0     | 2.2   | 1.0   | 1.2   | 4.8   | 0     | 13.3  | 11.9  | 18.3  | 20.5   |
|                      |       |       |       |       |       |       | 0.2   | 0.5   | 0.3   | 0.9    |
| <b>Az16-6</b>        | Lane1 | Lane2 | Lane3 | Lane4 | Lane5 | Lane6 | Lane7 | Lane8 | Lane9 | Lane10 |
| UV                   | –     | –     | –     | –     | –     | +     | +     | +     | +     | +      |
| Uncleaved<br>RNA (%) | 100   | 100   | 99.5  | 98.5  | 98.7  | 100   | 99.2  | 92.0  | 89.1  | 87.2   |
| Cleaved<br>RNA (%)   | 0     | 0     | 0.5   | 0.6   | 0.8   | 0     | 0.8   | 8.0   | 10.9  | 12.8   |
|                      |       |       |       | 0.9   | 0.5   |       |       |       |       |        |
| <b>Az16-7</b>        | Lane1 | Lane2 | Lane3 | Lane4 | Lane5 | Lane6 | Lane7 | Lane8 | Lane9 | Lane10 |
| UV                   | –     | –     | –     | –     | –     | +     | +     | +     | +     | +      |
| Uncleaved<br>RNA (%) | 100   | 100   | 100   | 100   | 100   | 100   | 100   | 100   | 100   | 100    |
| Cleaved<br>RNA (%)   | 0     | 0     | 0     | 0     | 0     | 0     | 0     | 0     | 0     | 0      |
| <b>Az18-4</b>        | Lane1 | Lane2 | Lane3 | Lane4 | Lane5 | Lane6 | Lane7 | Lane8 | Lane9 | Lane10 |

|               |       |       |       |       |       |       |       |       |       |        |
|---------------|-------|-------|-------|-------|-------|-------|-------|-------|-------|--------|
| UV            | –     | –     | –     | –     | –     | +     | +     | +     | +     | +      |
| Uncleaved     | 100   | 98.7  | 91.5  | 87.1  | 79.7  | 100   | 64.5  | 37.4  | 23.6  | 16.8   |
| RNA (%)       |       |       |       |       |       |       |       |       |       |        |
| Cleaved       | 0     | 1.3   | 8.5   | 12.9  | 20.3  | 0     | 6.8   | 10.5  | 10.2  | 7.2    |
| RNA (%)       |       |       |       |       |       |       | 28.7  | 52.1  | 66.2  | 76.0   |
| <b>Az18-5</b> | Lane1 | Lane2 | Lane3 | Lane4 | Lane5 | Lane6 | Lane7 | Lane8 | Lane9 | Lane10 |
| UV            | –     | –     | –     | –     | –     | +     | +     | +     | +     | +      |
| Uncleaved     | 100   | 99.7  | 99.0  | 97.3  | 95.8  | 100   | 94.4  | 84.8  | 71.4  | 63.3   |
| RNA (%)       |       |       |       |       |       |       |       |       |       |        |
| Cleaved       | 0     | 0.3   | 1.0   | 2.7   | 4.2   | 0     | 5.6   | 15.2  | 8.1   | 10.8   |
| RNA (%)       |       |       |       |       |       |       |       |       | 20.5  | 25.9   |
| <b>Az18-6</b> | Lane1 | Lane2 | Lane3 | Lane4 | Lane5 | Lane6 | Lane7 | Lane8 | Lane9 | Lane10 |
| UV            | –     | –     | –     | –     | –     | +     | +     | +     | +     | +      |
| Uncleaved     | 100   | 100   | 99.1  | 98.7  | 98.6  | 100   | 99.2  | 94.2  | 90.9  | 90.6   |
| RNA (%)       |       |       |       |       |       |       |       |       |       |        |
| Cleaved       | 0     | 0     | 0.5   | 0.7   | 0.9   | 0     | 0.8   | 5.8   | 9.1   | 9.4    |
| RNA (%)       |       |       | 0.4   | 0.6   | 0.5   |       |       |       |       |        |
| <b>Az18-7</b> | Lane1 | Lane2 | Lane3 | Lane4 | Lane5 | Lane6 | Lane7 | Lane8 | Lane9 | Lane10 |
| UV            | –     | –     | –     | –     | –     | +     | +     | +     | +     | +      |
| Uncleaved     | 100   | 100   | 98.8  | 97.9  | 97.9  | 100   | 100   | 98.7  | 98.2  | 98.2   |
| RNA (%)       |       |       |       |       |       |       |       |       |       |        |
| Cleaved       | 0     | 0     | 1.2   | 2.1   | 2.1   | 0     | 0     | 1.3   | 1.8   | 1.8    |
| RNA (%)       |       |       |       |       |       |       |       |       |       |        |
| <b>Az20-4</b> | Lane1 | Lane2 | Lane3 | Lane4 | Lane5 | Lane6 | Lane7 | Lane8 | Lane9 | Lane10 |
| UV            | –     | –     | –     | –     | –     | +     | +     | +     | +     | +      |
| Uncleaved     | 100   | 96.3  | 84.0  | 66.6  | 46.0  | 97.8  | 81.7  | 66.8  | 40.8  | 12.4   |
| RNA (%)       |       |       |       |       |       |       |       |       |       |        |
| Cleaved       | 0     | 3.7   | 16.0  | 8.8   | 14.3  | 1.2   | 7.3   | 10.8  | 59.2  | 87.6   |
| RNA (%)       |       |       |       | 24.6  | 39.7  | 1.0   | 11.0  | 22.4  |       |        |

| <b>Az20-5</b> | Lane1 | Lane2 | Lane3 | Lane4 | Lane5 | Lane6 | Lane7 | Lane8 | Lane9 | Lane10 |
|---------------|-------|-------|-------|-------|-------|-------|-------|-------|-------|--------|
| UV            | –     | –     | –     | –     | –     | +     | +     | +     | +     | +      |
| Uncleaved     | 100   | 96.2  | 94.2  | 65.8  | 55.2  | 100   | 98.1  | 65.9  | 31.2  | 34.4   |
| RNA (%)       |       |       |       |       |       |       |       |       |       |        |
| Cleaved       | 0     | 1.7   | 2.6   | 12.9  | 13.3  | 0     | 1.9   | 8.8   | 18.8  | 16.8   |
| RNA (%)       |       | 2.1   | 3.2   | 21.3  | 31.5  |       |       | 25.3  | 50.0  | 48.8   |
| <b>Az20-6</b> | Lane1 | Lane2 | Lane3 | Lane4 | Lane5 | Lane6 | Lane7 | Lane8 | Lane9 | Lane10 |
| UV            | –     | –     | –     | –     | –     | +     | +     | +     | +     | +      |
| Uncleaved     | 100   | 98.8  | 96.6  | 95.1  | 82.6  | 100   | 96.0  | 75.9  | 64.0  | 62.8   |
| RNA (%)       |       |       |       |       |       |       |       |       |       |        |
| Cleaved       | 0     | 0.8   | 1.9   | 2.4   | 8.9   | 0     | 2.3   | 12.7  | 19.8  | 20.3   |
| RNA (%)       |       | 0.4   | 1.5   | 2.5   | 8.5   |       | 1.7   | 11.4  | 16.2  | 16.9   |

## 6. Characterization of all azobenzene derivatives

**Figure S10.**  $^1\text{H}$  NMR,  $^{13}\text{C}$  NMR and  $^{31}\text{P}$  NMR of azobenzene derivatives

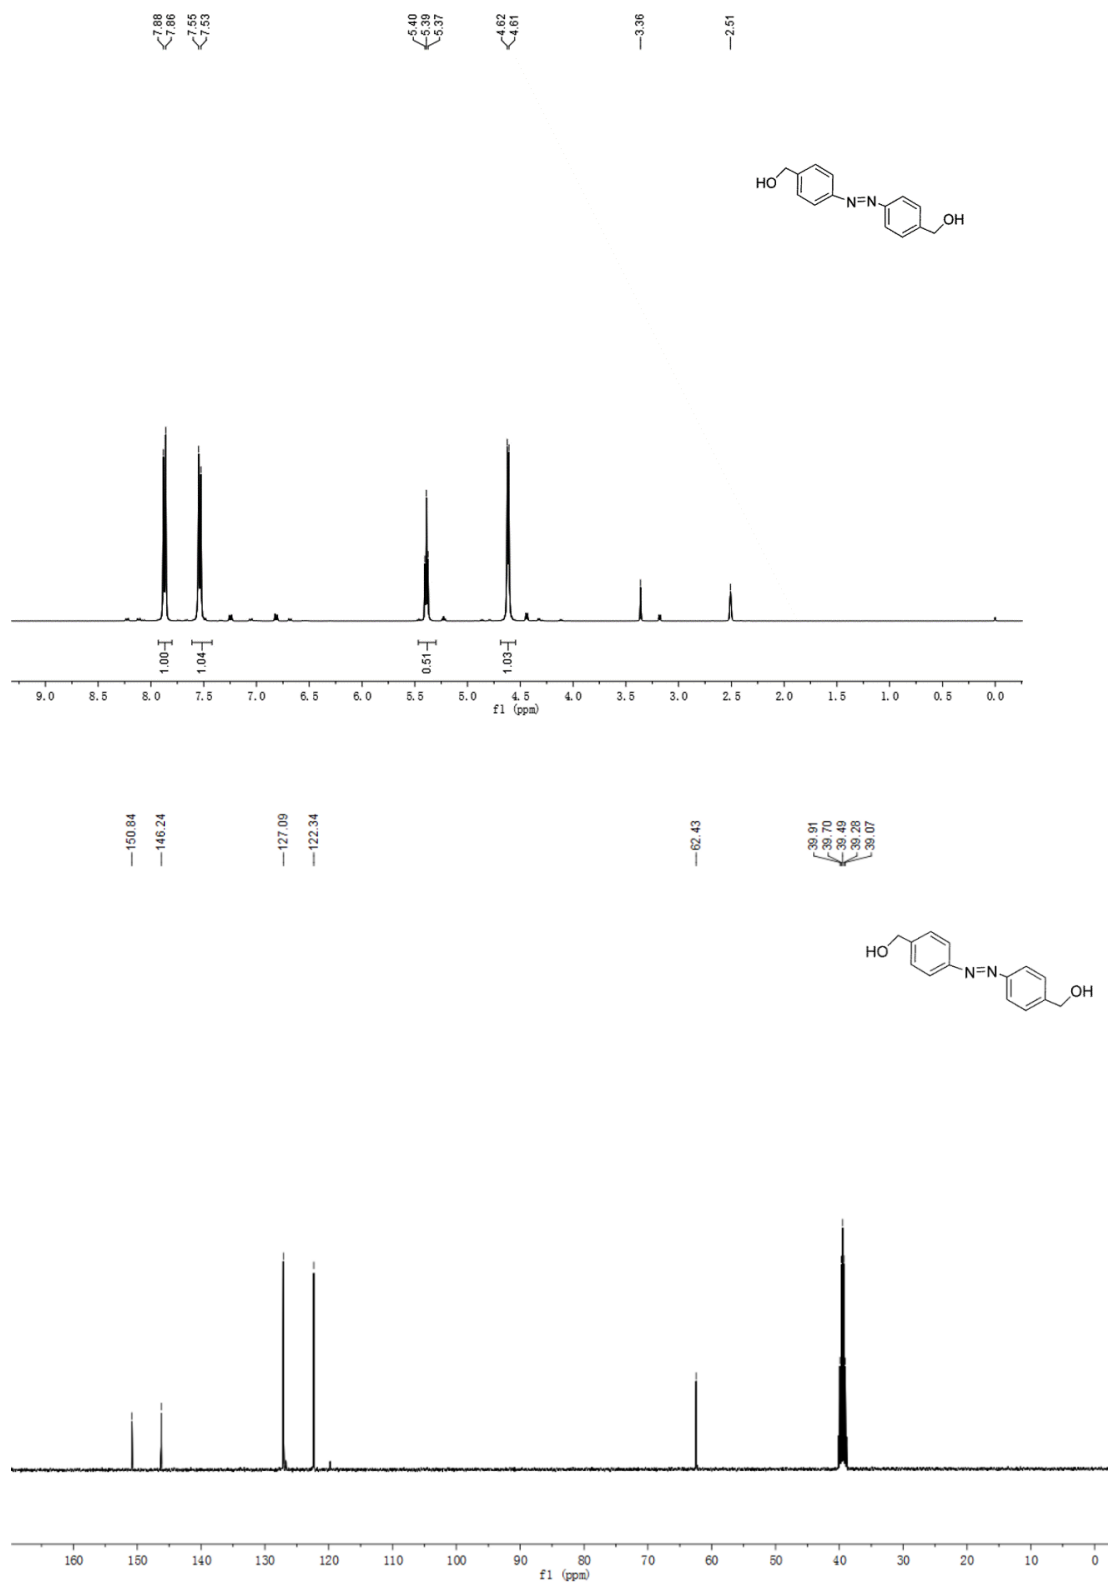

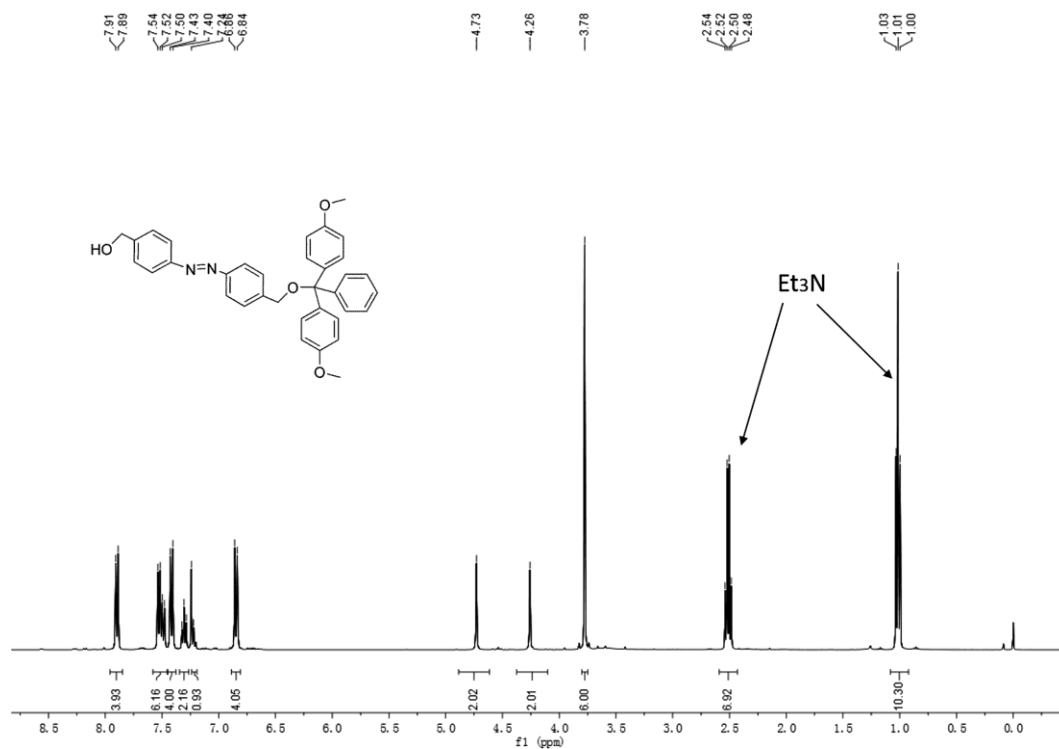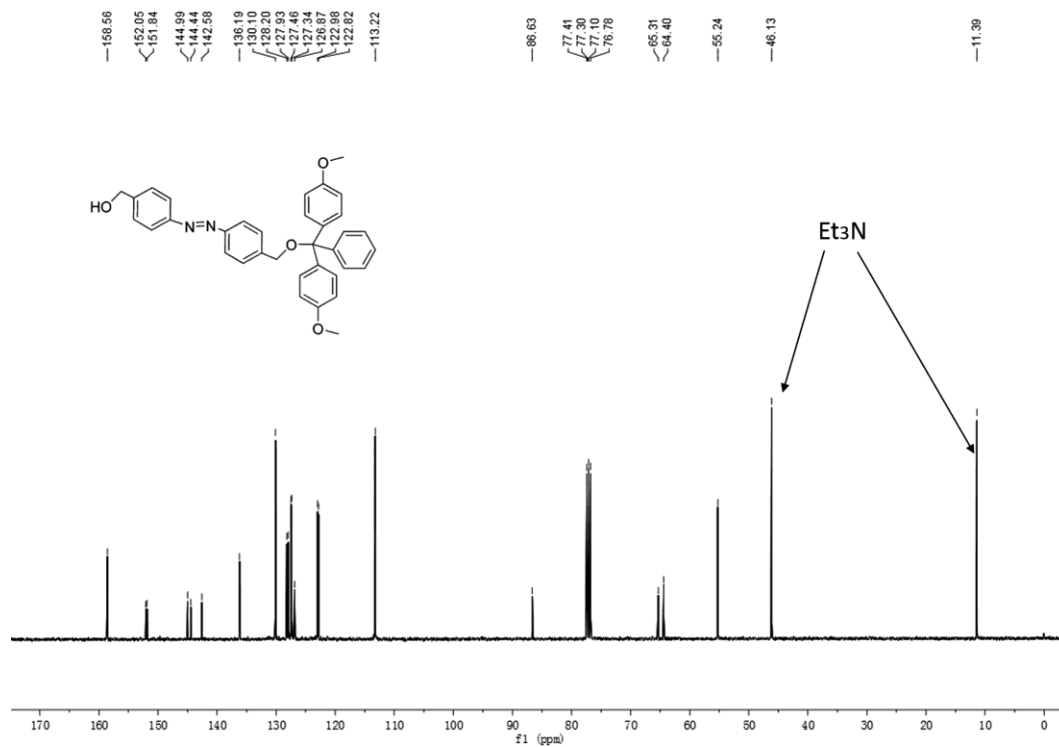

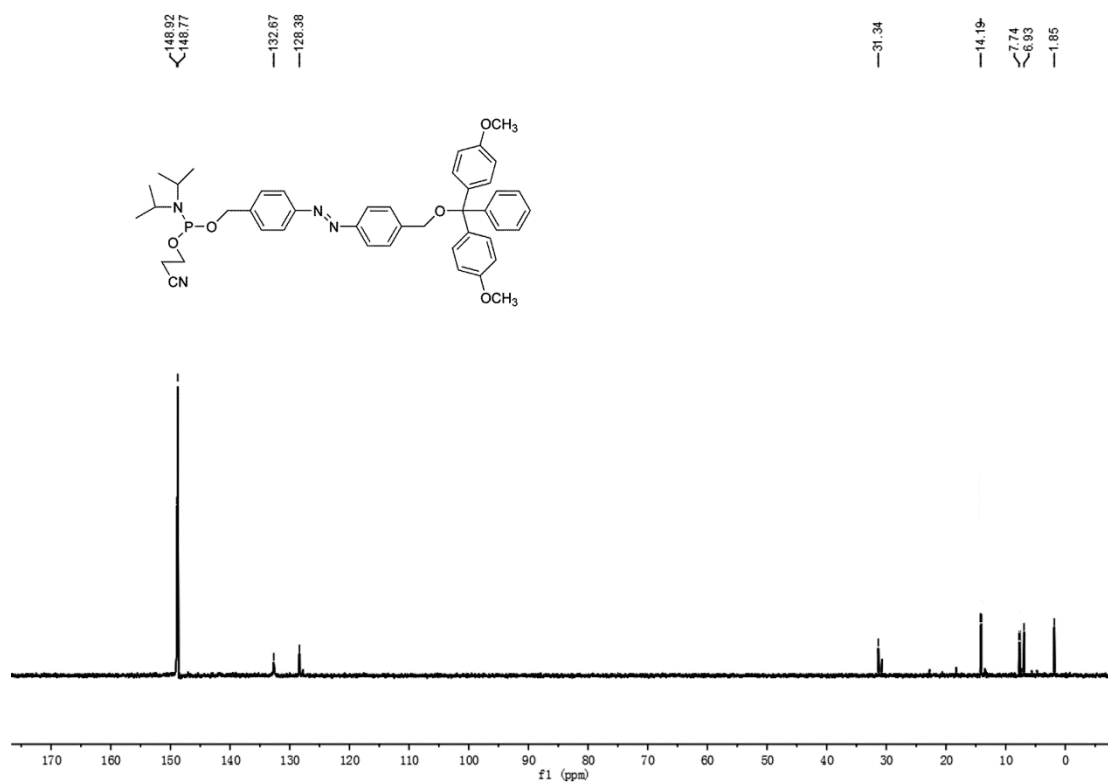

**<sup>31</sup>P spectra of 2-Cyanoethyl-4-O-[[4-(4,4'-dimethoxytrityl)-O-methyl-diazenyl]benzyl]-N,N'-diisopropylaminophosphoramidite**

## 7. Characterization of all azobenzene linked dumbbell asODNs

Table S4. Values for ESI-MS of azobenzene linked dumbbell asODNs.

| Name   | Sequence                                     | Calculated | Found   |
|--------|----------------------------------------------|------------|---------|
| Az16-4 | 5'-CGTTazoAACGTTTCGGACCGTAazoTACG-3'         | 7952.31    | 7954.2  |
| Az16-5 | 5'-ACGTTazoAACGTTTCGGACCGTAazoTACGG-3'       | 8594.73    | 8596.5  |
| Az16-6 | 5'-AACGTTazoAACGTTTCGGACCGTAazoTACGGT-3'     | 9212.14    | 9213.0  |
| Az16-7 | 5'-AAACGTTazoAACGTTTCGGACCGTAazoTACGGTC-3'   | 9814.53    | 9819.9  |
| Az18-4 | 5'-GTTGazoCAACGTTTCGGACCGTATazoATAC-3'       | 8569.72    | 8571.4  |
| Az18-5 | 5'-CGTTGazoCAACGTTTCGGACCGTATazoATACG-3'     | 9188.11    | 9190.1  |
| Az18-6 | 5'-ACGTTGazoCAACGTTTCGGACCGTATazoATACGG-3'   | 9830.53    | 9832.1  |
| Az18-7 | 5'-AACGTTGazoCAACGTTTCGGACCGTATazoATACGGT-3' | 10447.94   | 10450.2 |
| Az20-4 | 5'-TTGGazoCCAACGTTTCGGACCGTATTazoAATA-3'     | 9187.13    | 9188.2  |
| Az20-5 | 5'-GTTGGazoCCAACGTTTCGGACCGTATTazoAATAC-3'   | 9805.52    | 9807.1  |
| Az20-6 | 5'-CGTTGGazoCCAACGTTTCGGACCGTATTazoAATACG-3' | 10423.91   | 10426.1 |

Figure S11. ESI-MS spectra of azobenzene linked dumbbell asODNs.

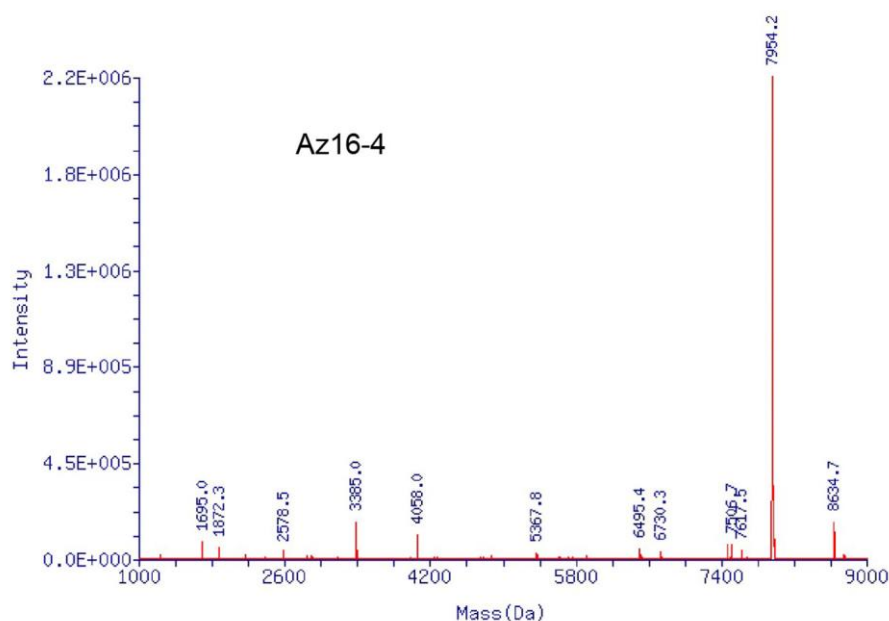

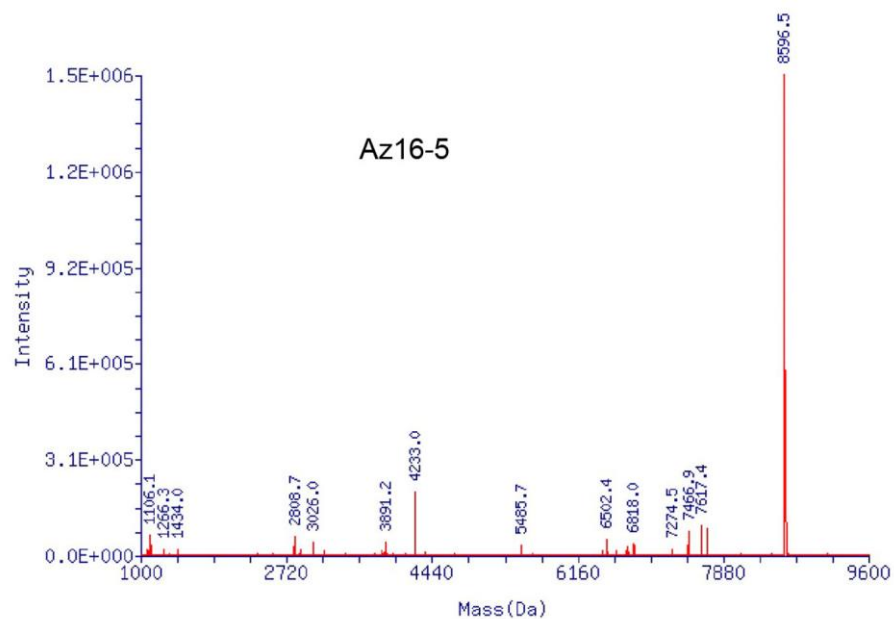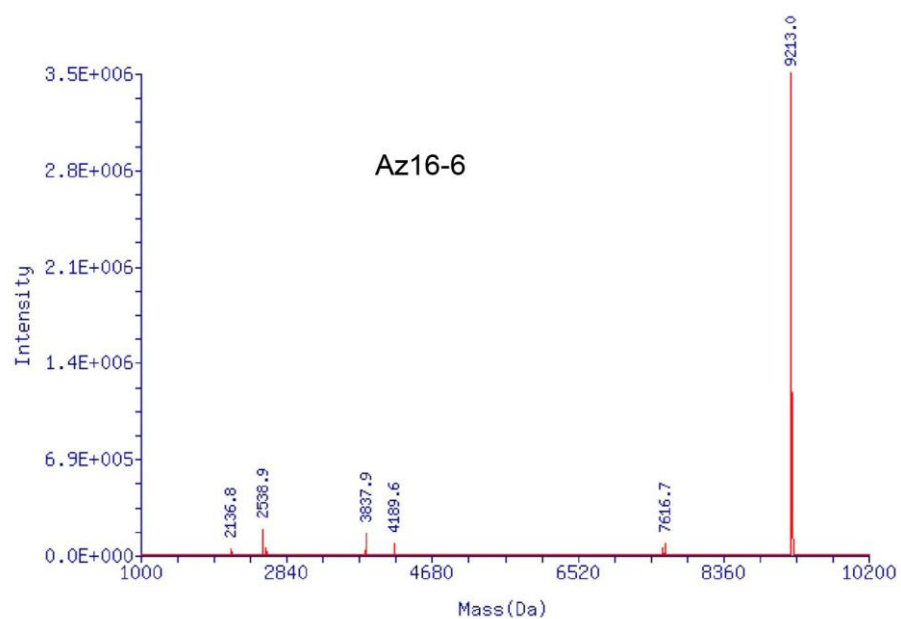



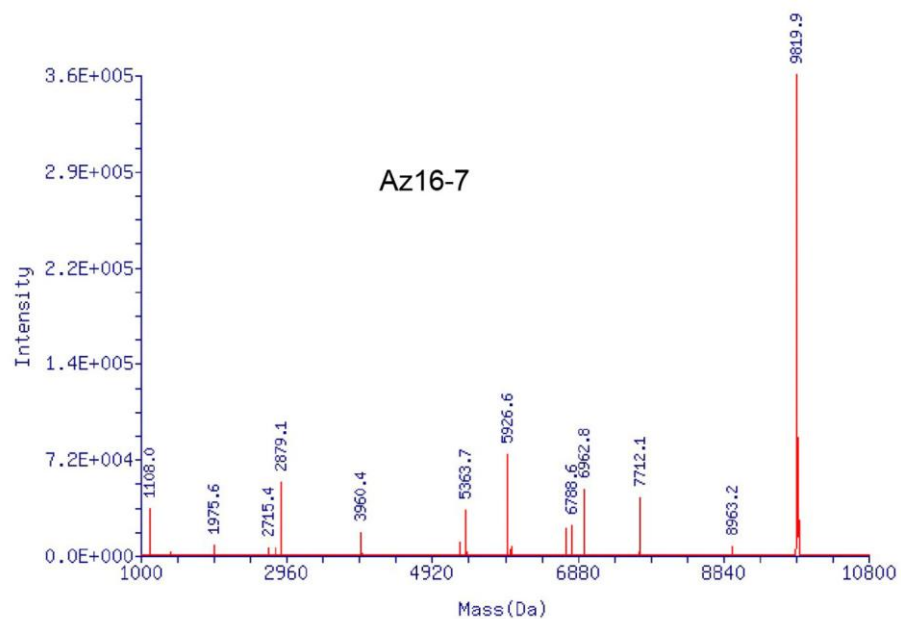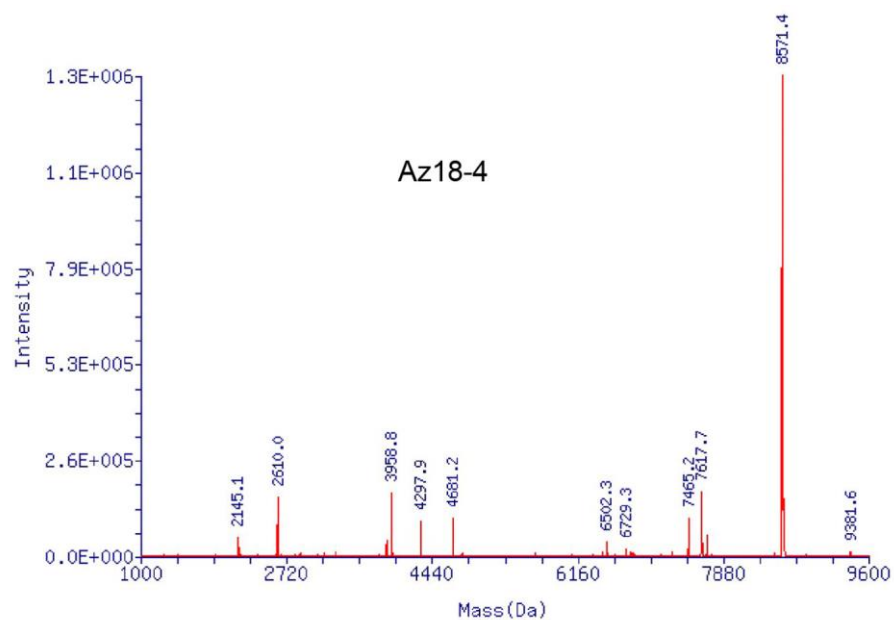

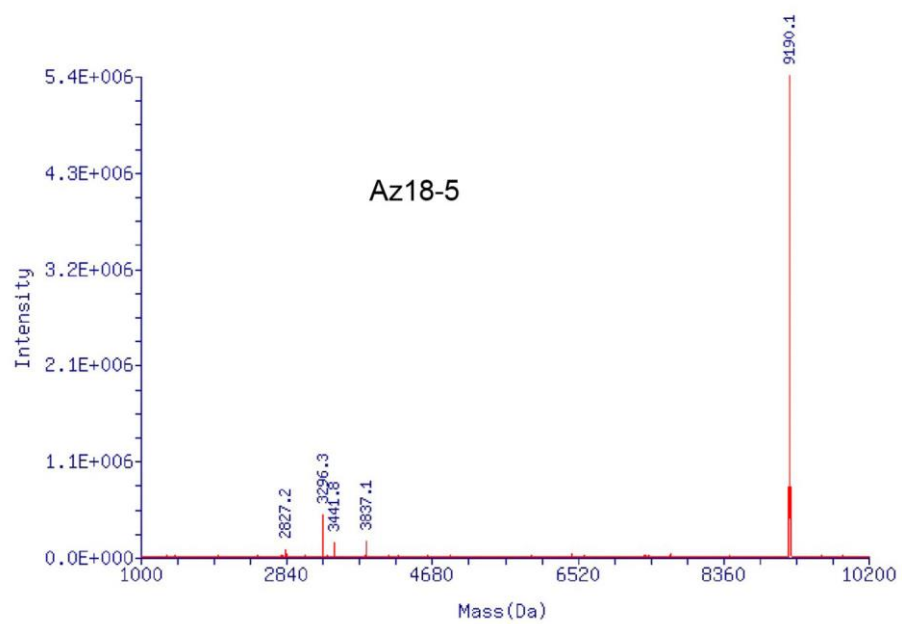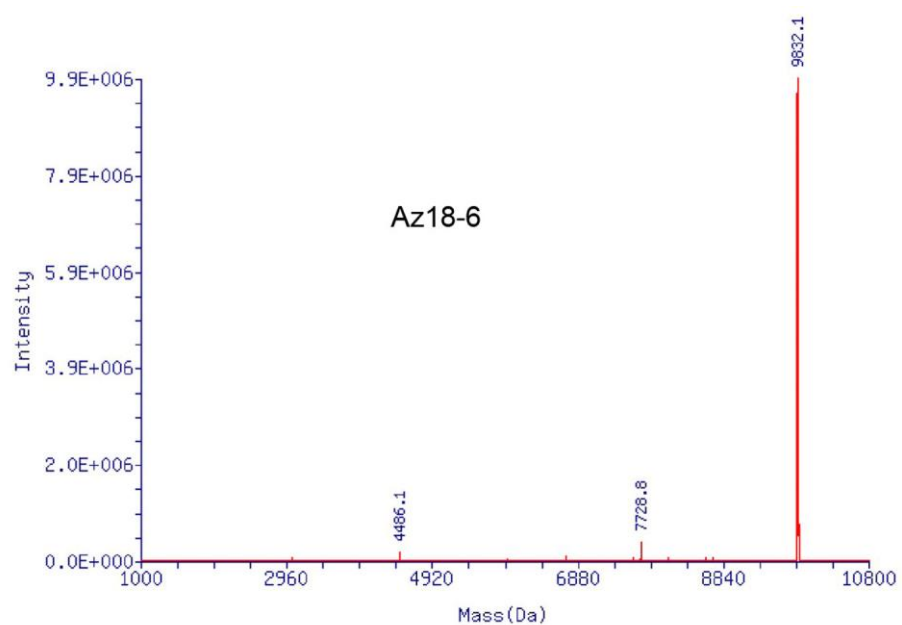

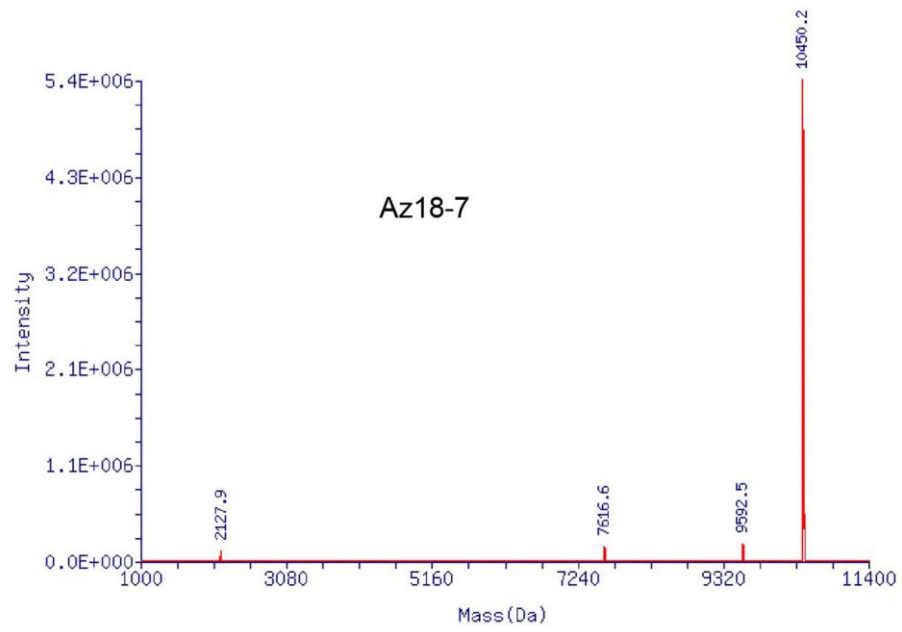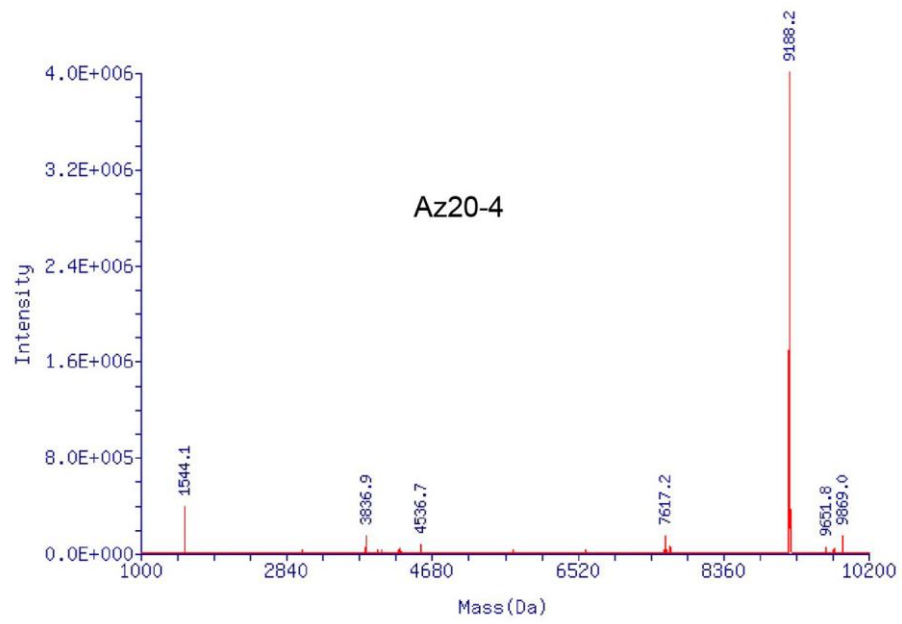

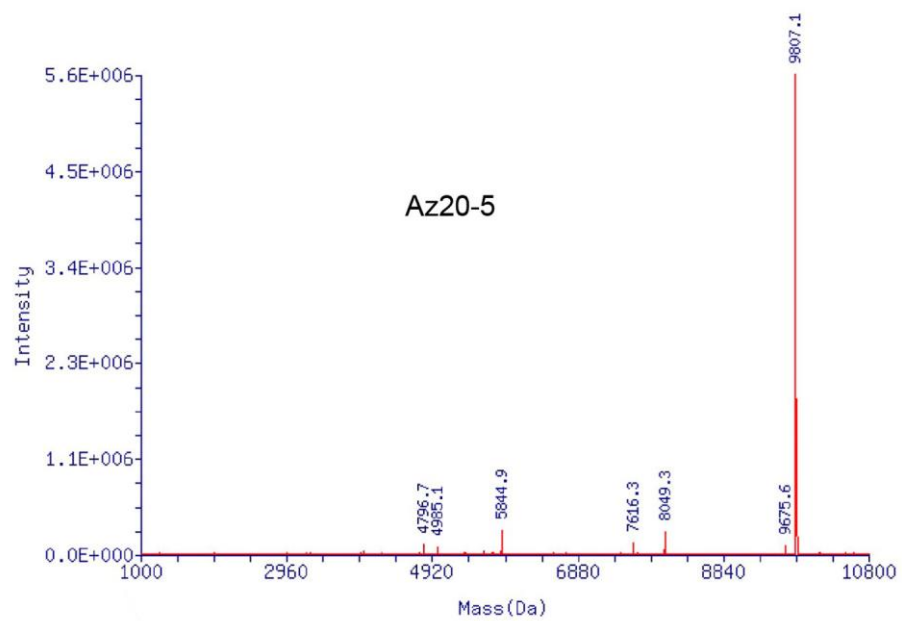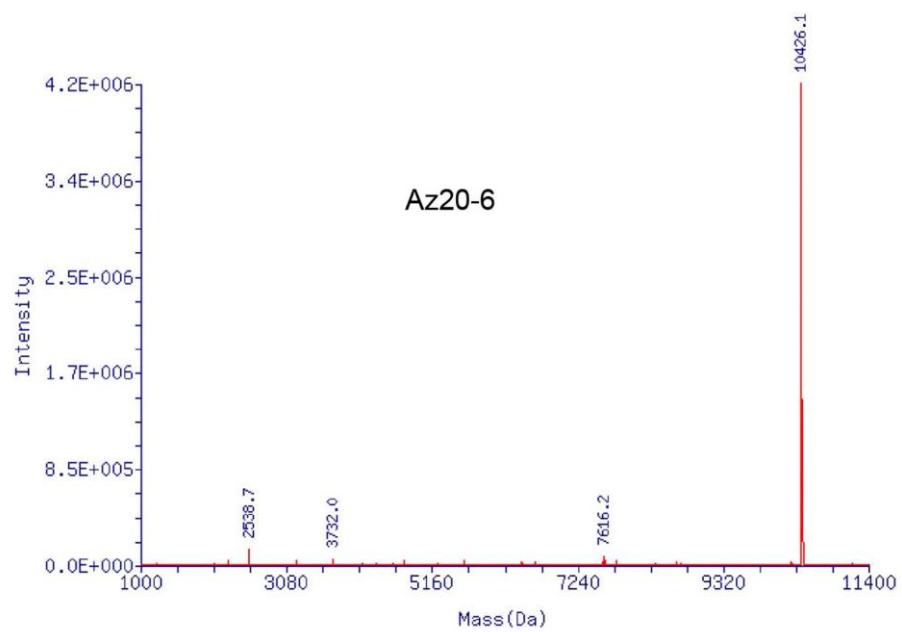

Supplement: Supplementary file 1 [file 3791461]
